# Supplementary material for: Evaluation Of Physical Activity And Diet Interventions In Preventing Childhood Obesity In The United States Of America: A Systematic Review
Source: Research Square preprint supplement (doi:10.21203/rs.3.rs-6035753/v1), 2025-03-04
Supplement: Supplementary file 1 [file 3841ed9ce4afc9448cccbb55.docx]

**SUPPLEMENTARY**

**Table 2. table showing the data extraction of selected studies**

| **S/N** | **Author/year** | **Study design** | **Study aims/objective** | **Study population/settings/country** | **Intervention duration** | **Description of interventions/theories or models used** | **Primary outcome/measures** | **Main findings** |
| --- | --- | --- | --- | --- | --- | --- | --- | --- |
| 1 | Soltero et al., 2018 | RCT | To assess the short-term and long-term advantages of a community-based lifestyle adjustment for obese Latino children. | 160 Hispanic teenagers (14-16 years old), parent or guardian. Phoenix, Arizona, USA | 12 months | Powered by an expanded eco-developmental model that illustrates the complex interaction between individual, peer, family, and community level impacts. Influenced by elements of Social Cognitive Theory, such as promoting self-efficacy for healthy lifestyle behaviours through goal-setting, vicarious experience, role modelling, and verbal support. It included nutrition and health education, scheduled and unstructured exercise (3 times per week for 60 minutes), and behaviour modification techniques. | Insulin sensitivity (oral glucose tolerance test), weight-specific quality of life (QoL) (26-item weight-specific module) with BMI percentile, waist circumference (triplicate to the closest 0.1 cm at the umbilical level using a Gulick II), and % body fat (bioelectrical impedance analysis) | Children in the intervention group demonstrated significant improvements in insulin sensitivity (P 0.05) and weight-specific quality of life (P 0.001) after 3 months, as well as reductions in body mass index (BMI), waist circumference, and body fat percentage, compared to those in the control group. Changes in insulin sensitivity maintained at 12 months, although improvements in weight-specific QOL, BMI percent, and body fat percentage did not (P0.001). At three months, there was a significant improvement in BMI % (P=0.001), weight-specific quality of life (P=0.001), and insulin sensitivity (P=0.01) in a subsample of young individuals with prediabetes at baseline. |
| 2 | Boutelle et al., 2017 | RCT | To determine if parent-based therapy (PBT) has the same effect on a child's weight loss over 24 months as family-based therapy (FBT). Additional objectives investigated the effects of these two interventions on parent weight reduction, child and parent nutritional intake, child and adult physical activity, parenting style, and parent feeding practises. | 150 children (8 & 12 years) with overweight/  obesity and their parent (Hispanic, 49% non-Hispanic white, and 20% other race/ethnicity). USA (greater San Diego, California, area) | 24  Months | The Family, Responsibility, Education, Support and Health (FRESH) study was a randomised clinial noninferiority trial that evaluated two 6-month therapies for paediatric obesity: PBT, which was given only to the parent, and FBT, which was given to both the parent and child. | Change in child weight (BMI z score) (weight in kilogrammes per square metre of height)  Changes in child and parent energy intake (three 24-hour dietary recalls using Nutrition Data System for Research) and physical activity (mean minutes/daily moderate and vigorous, Actigraph accelerometers), as well as changes in parent BMI, parenting style, and parent feeding behaviours, were evaluated (Questionnaire) | 150 children (mean BMI 26.4, mean BMI z score 2.0, mean age 10.4 years, 66.4% girls) and their parents (mean BMI 31.9, mean age 42.9 years, 87.3 percent women, 31% Hispanic, 49% non-Hispanic white, and 20% other race/ethnicity) were randomly allocated FBT or PBT. Both PBT and FBT weight loss in children was 0.25 BMI z-scores after six months. According to an intention-to-treat analysis using mixed linear models, PBT was not inferior to FBT on all outcomes at 6-, 12-, and 18-month follow-up, with a mean difference in child weight loss of 0.001 (95% confidence interval, 0.06 to 0.04) |
| 3 | Arlinghaus et al., 2017 | RCT | To investigate if involving Compañeros  in the implementation of nutrition and physical activity lessons could be a successful way for delivering an obesity prevention programme to middle school students in a largely Hispanic school system. | 200 Sixth-grade and seventh-grade students (11-13 years).  Hispanic (USA Houston, Texas) | Participants were tracked for a year in three cohorts from 2013 to 2016. | A school-based obesity intervention. Students engaged in one day of good eating and four days of physical activity per week. A token economy system was used to integrate a behavioural change. With the assistance of the PE teacher, Compañeros were trained to lead all intervention activities. Compañeros were also taught how to praise and the value of modelling. | zBMI (calculating height, weight, age & sex, CDC guidelines) at baseline, 6 months, and 12 months. Overall, implementation integrity was high for both circumstances. | Significant variations in circumstances were identified across time (F = 4.58, P =.01). Students in the condition with compaeros had a greater drop in zBMI after the 6-month intervention (F = 6.94, P =.01) than students in the condition without compaeros. Furthermore, children who got the intervention with compaeros had better long-term outcomes (F = 7.65, P =.01).  Using high school buddies in an obesity intervention for Hispanic middle school children may be beneficial in encouraging and maintaining zBMI reductions. |
| 4 | Fulkerson et al., 2020 | Two-group RCT | The NU-HOME intervention programme was designed to prevent childhood obesity in children aged 7 to 10 and was implemented in rural community settings with the participation of the entire family.. | 7–10-year-old children and a parent/guardian living in Rural Minnesota villages (USA) such as New Ulm and Sleepy Eye and mostly white | 7 monthly 2-hour in-person sessions (October-April) | Using a Social Cognitive Theory, a socio-ecological framework, and community engagement, the NU-HOME trial programme addressed the nutritious eating (healthy family meals and proper portion sizes, eating more fruits and vegetables) and physical activity of rural families (healthy family meals and proper portion sizes, eating more fruits and vegetables). In addition, it aims to increase child and parent skills and self-efficacy. After each session, four phone calls were made to parents utilising motivational interviewing. | BMI z-score (CDC), body fat percentage (Tanita scales) | There were no statistically significant effects of the intervention on the BMIz or overweight/obesity status of children. However, the intervention was associated with a promising reduction in the percent body fat of boys (2.1, 95 percent CI [4.84, 0.63]).  The programme produced high levels of consistency across all sessions and participant satisfaction. |
| 5 | Hull et al., 2018 | Cluster RCT | Evaluating the efficacy of a family-based, culturally-tailored programme to prevent weight gain in Hispanic immigrant households with children ages 5-7 | Carried out at a Hispanic community centre in Metropolitan Nashville, Tennessee, USA, Elementary school children (5-7 years), parent or guardian | One year | The active intervention for healthy families is a family-based approach informed by social cognitive theory, behavioural choice theory, and food preference theory. It is aimed for Hispanic families with children who are altering their culture through parental modelling and hands-on learning for children, such as promoting physical exercise, healthy eating habits, and reducing sedentary behaviour. Led by non-professional community health promoters | Child’s BMI-Z (kg m1 (2) age & gender),  absolute BMI, child’s waist circumference, physical activity (accelerometry), screen time, dietary behaviours (food frequency questionnaire) & preferences for fruits and vegetables | At the short-term (median 6 months; 168 families, 206 children) and long-term (median 16 months; 142 families, 169 children) follow-ups, the BMI-Z growth rate of the active treatment group did not differ from that of the attention control group. Dose-response analyses revealed a reduced short-term increase in BMI-Z among overweight or obese children who attended more intervention classes. Short-term increases in weekend moderate physical activity were observed. In the near future, participants who attended at least one class session reduced their weekend screen use. |
| 6 | Bowen et al., 2018 | RCT | To evaluate the effectiveness of an environmental nutrition and physical activity intervention targeted at reducing obesity in urban public housing units. | Girls aged 8–15 and female parents or guardians aged 18–72, 64% Latino (English or Spanish speaking), Boston,  USA | One year | A study on Healthy Families Community, organisational, and consumer nutrition and physical activity contexts at multiple levels, guided by qualified Healthy Living Advocates (HLA). Fresh Truck offered residents of public housing with quick, inexpensive, and convenient access to nutritious meals. Three months were devoted to cooking demonstrations conducted by dietitians. The HLA encouraged local fitness centres, walking paths, and healthy food options. | Change in weight (BMI) (height and weight), diet, and physical activity behaviors (survey questionnaire) | From baseline to one-year follow-up, intervention individuals improved their eating and activity habits as well as their body mass index (BMI) considerably (p's.05), but comparison participants reported no significant changes in any study variable. |
| 7 | Topham et al., 2021 | Longitudinal cluster, RCT | To investigate the impact of a novel multi-arm intervention targeting proximal (food-related parenting and child healthy eating and exercise) and distal (family and peer settings) determinants on child weight status across four years in a rural mid-south area of the U.S. | 1st-grade children (ages 6–7), parents, Rural mid-south area. European American (72.0%) & American Indian (18.5%) with a poverty level of 65% | Six-month with three years of follow-up | Project for Families and Schools to Promote Health In the spring, workshops offered by graduate and advanced undergraduate students at schools or community centres emphasise healthy food and exercise habits, general parenting, and strong family relationships. In other sessions, parents and children prepared and consumed a healthy snack together. The course named Family Lifestyle and Family Dynamics and Peer Group consisted of a total of 12 weekly 90-minute sessions. | BMI (CDC) and BMI-M% | Using a two-level random intercept growth model, the intervention status predicted fluctuations in BMI or BMI-M percent growth over the course of three years. Children with obesity who underwent the Family Lifestyle + Family Dynamics + Peer Group intervention had lower BMI growth in both raw BMI (B = 0.05) and BMI-M percent (B = 2.36) when compared to controls. |
| 8 | Moore et al., 2019 | 3-group RCT | To assess the impact of two family-based obesity management programme interventions on BMI in low-income adolescents who are overweight or obese to a control group. | Low-income minority middle school, children (age 10–11), a parent or guardian African Americans (77%), had a family income of 25 000/year, in Cleveland Metropolitan School District | 3 years | The impacts of two theoretically distinct family-based therapies, Healthy Modification (behaviour change tactics) and System Change (process improvement techniques), were evaluated. Both interventions focused on the same healthy living behaviors (diet, physical activity, sedentary activity, sleep, and stress management), with 25 face-to-face sessions with families in Year 1 and alternating monthly face-to-face group and individualised telephone sessions in Years 2 and 3, delivered by trained interventionists. | BMI (weight in kg/square of height in meters),  dietary intake (three 24- hour dietary recalls using Nutrition Data System for Research), physical activity (ActiGraph GT3X+ monitors),  waist circumference, tricep skinfold thickness, dietary intake | Over time, the BMI of all research groups increased, with group increases ranging from 0.95 to 1.08. In an intention-to-treat analysis, the adjusted BMI slopes did not differ significantly between the family-based therapy group and the control group (P =.35). Secondary outcomes, including nutrition, physical activity, sleep, perceived stress, and cardiometabolic variables, did not differ between the experimental and control groups. There was no evidence that gender, race/ethnicity, household income, baseline levels of child and parent obesity, or exposure to a school fitness programme modified the effects of the research arms. |
| 9 | Bogart et al., 2016 | RCT | Students for Nutrition and Exercise is a 5-week middle school-based obesity prevention intervention that combines school-wide environmental changes, encouragement to eat healthy school cafeteria foods, and peer-led education and marketing. The purpose of this study is to examine the long-term effects on BMI of a randomised controlled trial of Students for Nutrition and Exercise. | Children (aged 12-15), Los Angeles Unified School District, a primarily Latino school, low income | 5-week with 2 years follow-up | SNaX was tested as a 5-week middle school intervention that included improvements to the school-wide food environment and a seventh-grade peer leader group that used social marketing. Peer leaders trained through role-playing how to approach other students during lunchtime activities and family members at home in order to promote SNaX messaging (regarding cafeteria food, water, sugar-sweetened beverages, fruits/vegetables, and physical activity/inactivity). A short film was also utilised to encourage children to engage in activities with their parents at home. | BMI (weight in kg/square of height in meters, CDC) | Overall, the Nutrition and Exercise intervention had no effect on BMI percentile; however, intervention students who were obese at baseline (in seventh grade) demonstrated significant reductions in BMI percentile in ninth grade (b = -2.33 percentiles; SE, 0.85; P =.005) when compared to control students. At the sample's mean height and age at baseline, this result corresponds to a 9-pound (4.1-kg) decrease in expected body weight after two years for an obese student attending the intervention school, based on the sample's mean height and age at baseline. |
| 10 | Pbert et al., 2016 | Pair-matched RCT | This study examined the acceptability and efficacy of a school-based intervention consisting of school nurse-delivered counselling and an afterschool exercise programme for improving nutrition, activity, and body mass index (BMI) among overweight and obese adolescents. | Teenagers (aged 14-18) in Massachusetts' public high schools in grades 9 to 12 (White (61.8 percent to 94.4 percent) predominated in seven schools, with Hispanic (42.7 percent) predominating in one.) | 8 months | Lookin' Good Feelin' Good is a cognitive-behavioral counselling intervention delivered by a school nurse, in addition to an after-school fitness programme. The school nurse intervention included a counselling component and consisted of an intensive phase of 6-weekly 30-minute individual sessions followed by a maintenance phase of 6-monthly sessions and brief weekly weigh-ins conducted during nonacademic periods of the school day, which included a review of diet and physical activity. The after-school fitness programme consisted of three sessions per week for eight months, included group sports, games, and non-competitive exercise, and was led by school personnel with training and experience. | Diet (24-hour dietary recall interview using Interactive Nutrition Data System), activity (accelerometer using ActiGraph), and BMI (weight in kg/square of height in meters, CDC) | There was no difference in BMI, percent body fat, or waist circumference between intervention and control school kids at the follow-up. There were no variations in any intervention-targeted behaviours among students. |

**Table 3. shows the quality assessment of selected articles using the CASP checklist for RCT**

| S/N | Authors & year | Did the study address a clearly focused research question? | Was the assignment of participants to interventions randomised? | Were all participants who entered the study accounted for at its conclusion? | Were the participants ‘blind’ to intervention they were given? | Were the investigators ‘blind’ to the intervention they were giving to participants? | Were the people assessing/analysing outcome/s ‘blinded’? | Were the study groups similar at the start of the randomised controlled trial? | Apart from the experimental intervention, did each study group receive the same level of care (that is, were they treated equally)? | Were the effects of intervention reported comprehensively? | Was the precision of the estimate of the intervention or treatment effect reported? | Do the benefits of the experimental intervention outweigh the harms and costs? | Can the results be applied to your local population/in your context? | Would the experimental intervention provide greater value to the people in your care than any of the existing interventions? | Rating |
| --- | --- | --- | --- | --- | --- | --- | --- | --- | --- | --- | --- | --- | --- | --- | --- |
| 1 | Soltero et al., 2018 | Yes | Yes | Yes | No | No | Yes | Yes | Yes | Yes | No | Can’t tell | Can’t tell | Can’t tell | Medium quality |
| 2 | Boutelle et al., 2017 | Yes | Yes | Yes | No | No | Yes | Yes | Yes | Yes | Yes | Can’t tell | Can’t tell | Can’t tell | Medium quality |
| 3 | Arlinghaus et al., 2017 | Yes | Yes | Yes | No | No | Yes | Yes | Yes | Yes | No | Can’t tell | Can’t tell | Can’t tell | Medium quality |
| 4 | Fulkerson et al., 2020 | Yes | Yes | Yes | No | No | Yes | Yes | Yes | Yes | Yes | Can’t tell | Can’t tell | Can’t tell | Medium quality |
| 5 | Hull et al., 2018 | Yes | Yes | Yes | No | No | Yes | Yes | Yes | Yes | Can’t tell | Can’t tell | Can’t tell | Can’t tell | Medium quality |
| 6 | Bowen et al., 2018 | Yes | Yes | Yes | No | No | Yes | Yes | Yes | Yes | No | Can’t tell | Can’t tell | Can’t tell | Medium quality |
| 7 | Topham et al., 2021 | Yes | Yes | Yes | No | No | Yes | Yes | Yes | Yes | No | Can’t tell | Can’t tell | Can’t tell | Medium quality |
| 8 | Moore et al., 2019 | Yes | Yes | Yes | No | No | Yes | Yes | Yes | Yes | No | Can’t tell | Can’t tell | Can’t tell | Medium quality |
| 9 | Bogart et al., 2016 | Yes | Yes | Yes | No | No | Yes | Yes | Yes | Yes | Yes | Can’t tell | Can’t tell | Can’t tell | Medium quality |
| 10 | Pbert et al., 2016 | Yes | Yes | Yes | No | No | Yes | Yes | Yes | Yes | Yes | Can’t tell | Can’t tell | Can’t tell | Medium quality |
